# Supplementary material
Source: PubMed Central journal article supplement (PMC6583885)
Supplement: jamadermatol-155-797-s001.pdf [file jamadermatol-155-797-s001.pdf]

## Supplementary Online Content

Reddy S, Strunk A, Garg A. Comparative overall comorbidity burden among patients with hidradenitis suppurativa. *JAMA Dermatol*. Published online April 17, 2019. doi:10.1001/jamadermatol.2019.0164

### **eTable.** Charlson Comorbidity Index and Coding Algorithm

This supplementary material has been provided by the authors to give readers additional information about their work.

**eTable.** Charlson Comorbidity Index and Coding Algorithm

| <b>Comorbidities</b>                                                                   | <b>Weight</b> | <b>ICD-10</b>                                                                                                                                                                 | <b>Enhanced ICD-9-CM</b>                                                                                                             |
|----------------------------------------------------------------------------------------|---------------|-------------------------------------------------------------------------------------------------------------------------------------------------------------------------------|--------------------------------------------------------------------------------------------------------------------------------------|
| Myocardial infarction                                                                  | 1             | I21.x, I22.x, I25.2                                                                                                                                                           | 410.x, 412.x                                                                                                                         |
| Congestive heart failure                                                               | 1             | I09.9, I11.0, I13.0, I13.2, I25.5, I42.0, I42.5-I42.9, I43.x, I50.x, P29.0                                                                                                    | 398.91, 402.01, 402.11, 402.91, 404.01, 404.03, 404.11, 404.13, 404.91, 404.93, 425.4-425.9, 428.x                                   |
| Peripheral vascular disease                                                            | 1             | I70.x, I71.x, I73.1, I73.8, I73.9, I77.1, I79.0, I79.2, K55.1, K55.8, K55.9, Z95.8, Z95.9                                                                                     | 093.0, 437.3, 440.x, 441.x, 443.1-443.9, 447.1, 557.1, 557.9, V43.4                                                                  |
| Cerebrovascular disease                                                                | 1             | G45.x, G46.x, H34.0, I60.x-I69.x                                                                                                                                              | 362.34, 430.x-438.x                                                                                                                  |
| Dementia                                                                               | 1             | F00.x-F03.x, F05.1, G30.x, G31.1                                                                                                                                              | 290.x, 294.1, 331.2                                                                                                                  |
| Chronic pulmonary disease                                                              | 1             | I27.8, I27.9, J40.x-J47.x, J60.x-J67.x, J68.4, J70.1, J70.3                                                                                                                   | 416.8, 416.9, 490.x-505.x, 506.4, 508.1, 508.8                                                                                       |
| Rheumatic disease                                                                      | 1             | M05.x, M06.x, M31.5, M32.x-M34.x, M35.1, M35.3, M36.0                                                                                                                         | 446.5, 710.0-710.4, 714.0-714.2, 714.8, 725.x                                                                                        |
| Peptic ulcer disease                                                                   | 1             | K25.x-K28.x                                                                                                                                                                   | 531.x-534.x                                                                                                                          |
| Mild liver disease                                                                     | 1             | B18.x, K70.0-K70.3, K70.9, K71.3-K71.5, K71.7, K73.x, K74.x, K76.0, K76.2-K76.4, K76.8, K76.9, Z94.4                                                                          | 070.22, 070.23, 070.32, 070.33, 070.44, 070.54, 070.6, 070.9, 570.x, 571.x, 573.3, 573.4, 573.8, 573.9, V42.7                        |
| Diabetes without chronic complication                                                  | 1             | E10.0, E10.1, E10.6, E10.8, E10.9, E11.0, E11.1, E11.6, E11.8, E11.9, E12.0, E12.1, E12.6, E12.8, E12.9, E13.0, E13.1, E13.6, E13.8, E13.9, E14.0, E14.1, E14.6, E14.8, E14.9 | 250.0-250.3, 250.8, 250.9                                                                                                            |
| Diabetes with chronic complication                                                     | 2             | E10.2-E10.5, E10.7, E11.2-E11.5, E11.7, E12.2-E12.5, E12.7, E13.2-E13.5, E13.7, E14.2-E14.5, E14.7                                                                            | 250.4-250.7                                                                                                                          |
| Hemiplegia or paraplegia                                                               | 2             | G04.1, G11.4, G80.1, G80.2, G81.x, G82.x, G83.0-G83.4, G83.9                                                                                                                  | 334.1, 342.x, 343.x, 344.0-344.6, 344.9                                                                                              |
| Renal disease                                                                          | 2             | I12.0, I13.1, N03.2-N03.7, N05.2-N05.7, N18.x, N19.x, N25.0, Z49.0-Z49.2, Z94.0, Z99.2                                                                                        | 403.01, 403.11, 403.91, 404.02, 404.03, 404.12, 404.13, 404.92, 404.93, 582.x, 583.0-583.7, 585.x, 586.x, 588.0, V42.0, V45.1, V56.x |
| Any malignancy, including lymphoma and leukemia, except malignant neoplasm of the skin | 2             | C00.x-C26.x, C30.x-C34.x, C37.x-C41.x, C43.x, C45.x-C58.x, C60.x-C76.x, C81.x-C85.x, C88.x, C90.x-C97.x                                                                       | 140.x-172.x, 174.x-195.8, 200.x-208.x, 238.6                                                                                         |

|                                  |   |                                                                             |                          |
|----------------------------------|---|-----------------------------------------------------------------------------|--------------------------|
| Moderate or severe liver disease | 3 | I85.0, I85.9, I86.4, I98.2, K70.4, K71.1, K72.1, K72.9, K76.5, K76.6, K76.7 | 456.0-456.2, 572.2-572.8 |
| Metastatic solid tumor           | 6 | C77.x-C80.x                                                                 | 196.x-199.x              |
| AIDS/HIV                         | 6 | B20.x-B22.x, B24.x                                                          | 042.x-044.x              |

Source: Quan H, Sundararajan V, Halfon P, et al. Coding algorithms for defining Comorbidities in ICD-9-CM and ICD-10 administrative data. Med Care. 2005 Nov; 43(11): 1130-9.
